# Supplementary material
Source: Springer Nature journal article supplement (https://www.springermedizin.de/resource/supplementary/13047_2013_579_MOESM3_ESM.pdf/9664016)

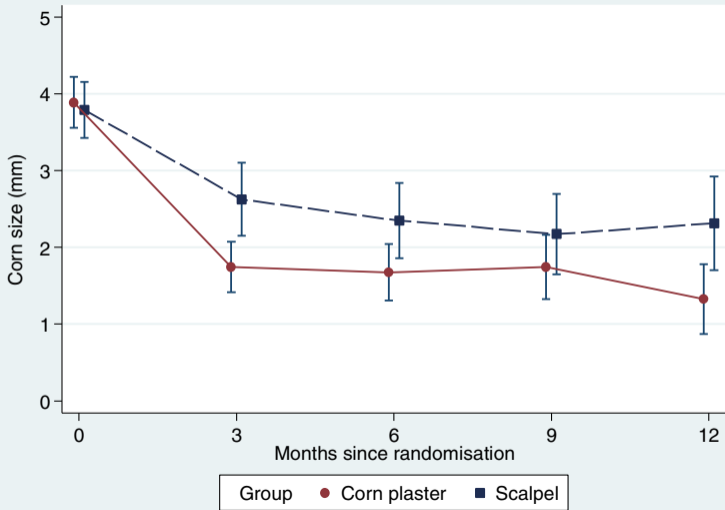

Supplement: MOESM3 [file 9664016]
